# Supplementary material for: Solution-free, in situ preparation of nano/micro CuO/ZnO in dielectric barrier discharge for sensitive cataluminescence sensing of acetic acid
Source: Royal Society of Chemistry journal article supplement (doi:10.1039/c3an00407d), 2013-01-01
Supplement: c3an00407d.pdf [file c3an00407d.pdf]

## Supporting information

### **Solution-free, *in situ* preparation of nano/micro CuO/ZnO in dielectric barrier discharge for sensitive cataluminescence sensing of acetic acid**

Hui Xia, Ronghui Zhou, Chengbin Zheng, Peng Wu, Yunfei Tian, and  
Xiandeng Hou\*

*Analytical & Testing Center, and College of Chemistry, Sichuan University, 29*

*Wangjiang Road, Chengdu 610064, China*

\*To whom correspondence should be addressed. E-mail: [houxd@scu.edu.cn](mailto:houxid@scu.edu.cn)

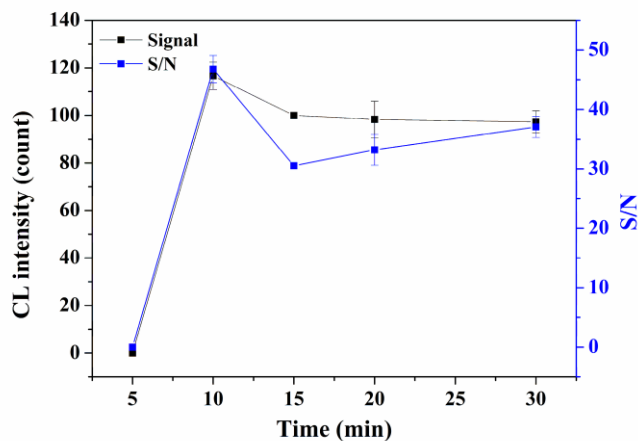

Figure S1. Optimization of the time of reaction for the DBD synthesis. Voltage: 150 V; flow rate of carrier gas: 600 mL min<sup>-1</sup>; concentration of acetic acid: 120 mg L<sup>-1</sup>; CTL temperature: 295 °C; flow rate of carrier gas for CTL: 600 mL min<sup>-1</sup>; and wavelength: 440 nm.

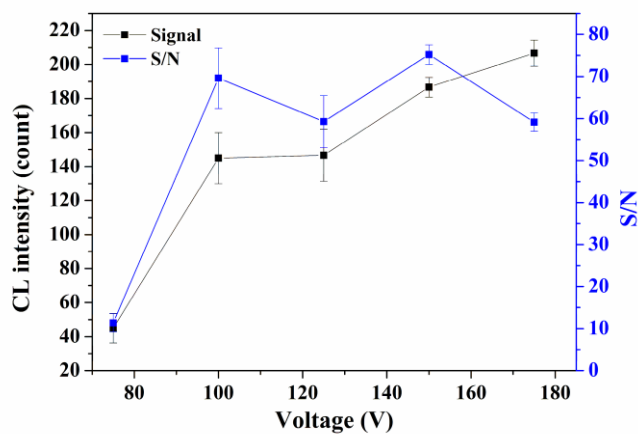

Figure S2. Optimization of the voltage of reaction for the DBD synthesis. Time of reaction: 10 min; flow rate of carrier gas: 600 mL min<sup>-1</sup>; concentration of acetic acid: 120 mg L<sup>-1</sup>; CTL temperature: 295 °C; flow rate of carrier gas for CTL: 600 mL min<sup>-1</sup>; and wavelength: 440 nm.

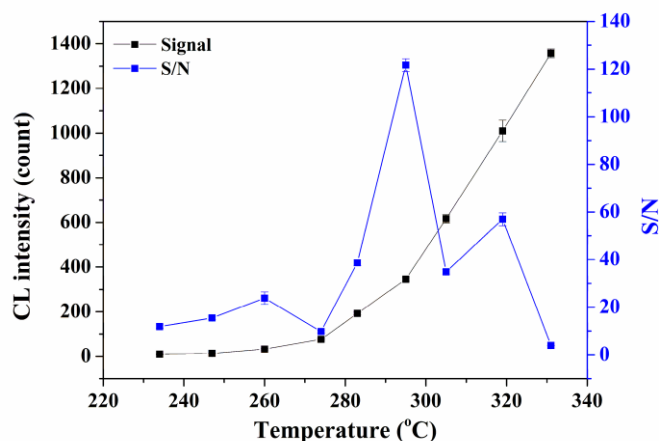

Figure S3. Optimization of temperature for CTL. (a) DBD synthesis conditions: time of reaction, 10 min; voltage, 150 V; and flow rate of carrier gas, 600 mL min<sup>-1</sup>. (b) concentration of acetic acid: 120 mg L<sup>-1</sup>; flow rate of carrier gas for CTL: 1000 mL min<sup>-1</sup>; and wavelength: 440 nm.

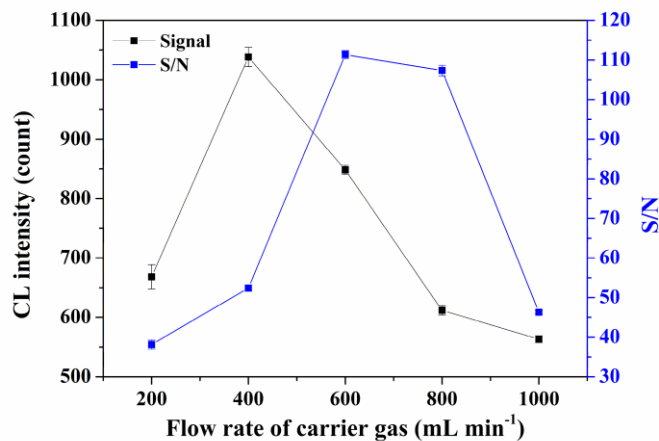

Figure S4. Optimization of flow rate of carrier gas for CTL. (a) DBD synthesis conditions: time of reaction, 10 min; voltage, 150 V; and flow rate of carrier gas, 600 mL min<sup>-1</sup>. (b) concentration of acetic acid: 120 mg L<sup>-1</sup>; CTL temperature: 295 °C; and wavelength: 440 nm.

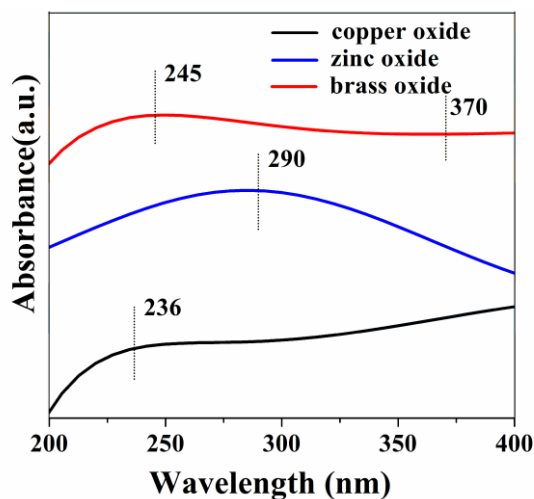

Figure S5. UV/Vis diffuse reflectance spectra (DRS) of CuO, ZnO and brass oxides.

The UV/Vis DRS are shown in Figure S5. For the brass oxides sample, two absorption bands at around 245 and 370 nm are observed, thus indicating that the states of  $\text{Cu}^{2+}$  and  $\text{Zn}^{2+}$  species in the brass oxides sample are basically consistent with those in CuO and ZnO samples, noticeably, the absorption band at around 236 nm (observed over CuO) red-shifted to 245 nm, which might be due to the interaction between  $\text{Cu}^{2+}$  and  $\text{Zn}^{2+}$  ions. Similar results have also been reported by Li et al.<sup>[s1]</sup> when they discussed the formation of Cu-O-Mn. The UV/Vis result suggested that the interaction of Cu and Zn species on the brass surface could occur through the formation of a Cu-O-Zn composites.

[s1] D. Li, Q. Yu, S.-S. Li, H.-Q. Wan, L.-J. Liu, L. Qi, B. Liu, F. Gao, L. Dong, Y. Chen, *Chem.-Eur. J.* **2011**, *17*, 5668.

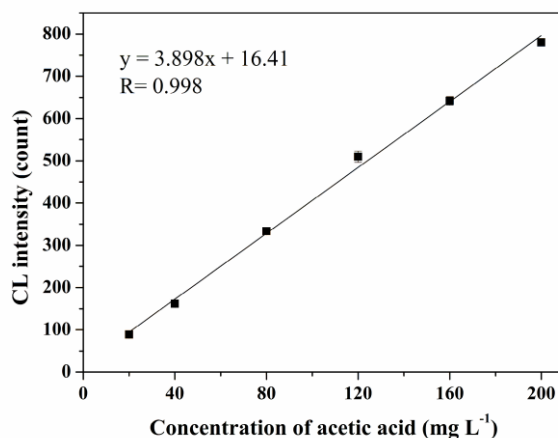

Figure S6. The calibration curve for acetic acid. (a) DBD synthesis conditions: time of reaction, 10 min; voltage, 150 V; and flow rate of carrier gas, 600 mL min<sup>-1</sup>. (b) Sampling volume: 6 µL; CTL temperature: 295 °C; flow rate of carrier gas for the CTL: 600 mL min<sup>-1</sup>; and wavelength: 440 nm.

The linear regression equation is described as  $Y = 3.898X + 16.41$  ( $r=0.998$ ), where  $Y$  is the relative CTL intensity,  $X$  is the concentration of acetic acid and  $r$  is the linear regression coefficient. The limit of detection (LOD) based on  $3N/S$  ( $N$  refers to the noise and  $S$  refers to the slope of the calibration curve) is  $3 \text{ mg L}^{-1}$ .

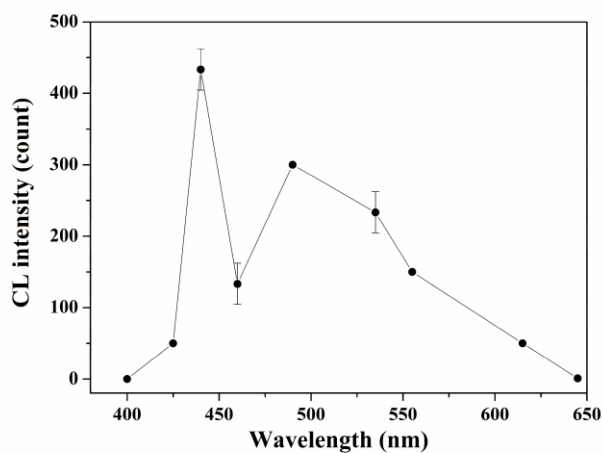

Figure S7. The CTL spectra on CuO/ZnO materials. (a) DBD synthesis conditions: time of reaction, 10 min; voltage, 150 V; and flow rate of carrier gas, 600 mL min<sup>-1</sup>. (b) Sampling volume: 6  $\mu\text{L}$ ; CTL temperature: 295  $^{\circ}\text{C}$ ; and flow rate of carrier gas for the CTL: 600 mL min<sup>-1</sup>.
